# Supplementary material for: Guanxinkang Decoction Attenuates the Inflammation in Atherosclerosis by Regulating Efferocytosis and MAPKs Signaling Pathway in LDLR−/− Mice and RAW264.7 Cells
Source: Front Pharmacol. 2021 Dec 7;12:731769. doi: 10.3389/fphar.2021.731769 (PMC8688952; doi:10.3389/fphar.2021.731769)
Supplement: Supplementary file 2 [file DataSheet7.xlsx]

## Sheet: figure1
	Figure 1-A	B	C		Figure 1-E			Figure 1-F	H	J
	Serum Lipid				Atherosclerotic Lesion Area			Immunofluorescence staining area(%)
Group	CHOL	TRIG	LDL-C		Group	Ratio		NF-kB p65	a-SMA	Caspase 3
C	2.25	0.81	0.33		C	0		0.259	10.838	0.186
	1.74	0.9	0.24			0		0.243	8.957	0.247
	2.28	0.9	0.27			0		0.514	15.36	0.11
	2.97	1.02	0.36		M	29.5701		13.452	1.26	24.752
	2.85	1.05	0.39			48.1302		15.07	1.577	29.094
	1.89	1.08	0.24			21.7643		21.976	1.119	14.989
	1.94	0.95	0.28		GL	11.3968		12.518	3.388	11.547
	2.38	1.12	0.31			7.05509		3.458	4.071	5.394
M	55.29	6.3	33.36			5.97483		4.232	2.599	5.687
	51.84	6.36	31.08		GM	8.33007		1.361	2.56	2.509
	51.51	6.42	30.78			6.88308		2.111	2.59	1.7
	50.25	7.68	30.21			4.47806		4.033	1.204	2.733
	49.83	7.77	29.82		GH	1.51923		2.226	4.682	1.661
	49.26	8.76	29.04			1.22637		0.747	3.714	0.692
	52.56	7.53	32.34			0.995375		2.869	4.346	4.798
	52.77	6.945	28.03		Ato	2.7667		1.363	3.088	2.714
GL	46.47	3.93	29.28			1.88519		1.015	2.96	0.739
	44.88	5.04	28.65			1.52992		2.439	3.865	1.787
	43.47	5.25	27.57
	43.02	6.12	29.67
	39.93	4.83	27.33
	37.95	5.31	26.28
	48.03	6.32	24.38
	40.5	4.85	25.68
GM	41.1	3.03	26.19
	40.5	4.4	25.77
	37.14	4.5	24.87
	34.8	3.51	24.36
	33.72	3.57	23.34
	31.14	4.25	22.68
	38.98	3.57	23.59
	35.78	4.02	25.09
GH	37.86	3.03	25.02
	34.23	4.17	23.61
	33.81	2.34	21.54
	30.66	2.58	20.91
	29.52	2.76	19.2
	27.54	3.15	17.85
	30.15	4.09	19.89
	32.59	3.76	22.56
Ato	29.43	3.93	20.49
	29.25	2.58	20.01
	27.54	3.51	19.8
	26.94	3.03	19.2
	25.02	1.98	17.85
	20.13	2.76	16.44
	21.56	2.58	15.99
	23.59	2.79	18.56

## Sheet: figure2
	Figure 2-A	B	C		D	E	F			H	I	J
Group	IL1 mRNA	IL6 mRNA	TNF mRNA		IL1	IL6	TNF		Group	iNOS	LOX-1	MCP-1
C	0.39727	1.29285	1.14901		28.8168	5.49413	6.83881		C	1	1	1
	0.870229	1.19824	1.07402		38.441	3.72452	8.08577			1	1	1
	1.27636	1.10088	0.997172		51.593	7.28451	8.39781			1	1	1
	1.28104	0.945651	0.972861		55.9843	5.82953	10.5853		M	4.69	2.63	1.81
	1.32434	0.904822	0.951958		61.2587	6.50062	12.1514			3.8	1.66	2.47
	1.33582	0.685275	0.877447		61.2587	7.17211	12.1514			5.85	1.31	2.08
	0.866544	0.989062	1.01323		57.5832	4.3126	9.2387		GL	4.22	2.02	1.45
	1.07563	1.05153	1.01299		40.2358	6.5939	10.5784			3.71	0.87	1.54
M	6.05031	6.1519	14.6675		150.842	41.9596	95.8863			5.64	1.12	1.42
	6.71574	5.84594	13.0277		179.544	51.6998	99.3637		GM	3.46	1.33	1.04
	6.75509	5.22655	11.8084		188.546	55.5495	106.715			4.23	0.6	1.08
	6.97269	4.69597	7.31806		189.447	59.0606	143.02			2.91	1.04	0.96
	7.12859	4.61079	5.60827		213.832	75.3538	149.662		GH	1.81	0.9	0.93
	7.17765	4.49696	5.37172		225.613	91.8854	270.383			1.17	0.72	0.95
	6.92216	5.17145	10.1379		188.228	66.9225	119.453			1.12	0.6	1.03
	7.05064	5.32443	9.56324		182.337	74.2629	117.421
GL	2.95479	4.01487	4.65085		117.848	27.8471	64.5658
	4.11709	3.81526	4.41173		123.184	29.2162	67.913
	3.31351	3.80414	4.27673		128.526	32.9897	68.2485
	4.65595	3.64501	4.13503		146.371	40.5749	71.6107
	4.84715	3.49253	3.75253		148.159	22.047	76.68
	4.94157	2.83446	3.59197		104.53	19.3278	54.605
	4.12754	3.42466	4.20169		125.451	34.8955	72.2965
	3.90097	3.71977	3.67225		116.528	27.5184	61.259
GM	3.80163	2.48126	2.28748		107.191	27.1632	53.6155
	3.0008	2.31204	3.18196		109.853	26.8214	51.6401
	3.2291	2.27428	3.18177		113.405	19.6674	43.7854
	3.49712	2.25854	3.14131		95.6706	21.3666	44.1112
	3.55602	2.21696	3.0215		100.099	17.9707	36.9733
	3.6079	2.20628	2.95469		83.2919	16.9539	39.5618
	2.90884	1.98357	3.06833		108.421	26.3364	48.2121
	3.06897	2.12106	2.9349		95.7838	24.4034	40.3649
GH	1.98924	2.36489	3.1614		101.871	25.4552	49.0135
	1.99488	2.34647	2.74666		100.851	18.9884	44.7631
	2.40564	2.11301	3.49867		85.942	17.6317	39.8859
	3.91361	2.08778	2.35351		92.1309	13.5713	29.8965
	2.88517	2.01233	2.19503		72.7045	15.5815	35.6821
	2.902	1.97586	1.72061		78.8779	14.9231	25.106
	2.95143	1.9941	2.60964		79.3233	12.3368	33.0598
	2.19744	2.23895	2.16512		86.7777	18.896	30.784

## Sheet: figure3 
	Figure 3-A	B	C		E	F	G	H
Group	AXL mRNA	MERTK mRNA	TYRO3 mRNA		AXL	MERTK	TYRO3	MFGE8
C	1.37324	0.790197	1.08476		1	1	1	1
	1.4282	0.942804	1.01315		1	1	1	1
	1.5893	1.34228	0.909895		1	1	1	1
M	1.1236	1.08831	0.167451		0.38	0.2	0.31	0.3
	0.735181	0.755943	0.105291		0.49	0.22	0.29	0.38
	0.464617	0.346147	0.131017		0.48	0.2	0.35	0.42
GL	0.713614	0.848979	0.187239		1.58	0.52	1.06	1.26
	0.982245	0.84829	0.199655		1.28	0.41	1.67	1.58
	1.09609	1.51373	0.178741		0.73	1.07	0.59	0.87
GM	1.13541	0.915311	0.356195		1.26	0.44	0.77	1.01
	1.01817	1.47871	0.488441		0.97	0.34	0.99	2.55
	1.24106	2.10177	0.371224		0.94	0.53	0.78	1.49
GH	1.94039	3.77941	0.391281		1.79	0.44	0.95	1.14
	1.07219	3.15777	0.799858		1	0.43	1.82	1.29
	2.07484	3.17597	0.559437		0.74	0.86	1.01	1.16

## Sheet: figure4
	Figure 4-B	C	D	E
Group	p-JNK	p-ERK1/2	p-P38	p-NF-κB
C	1	1	1	1
	1	1	1	1
	1	1	1	1
M	1.75	3.12	2.02	2.76545
	2.9	1.54	1.88	3.54956
	3.21	1.84	2.4	1.42692
GL	1.3	1.4	1.51	1.11051
	2.79	0.82	1.29	2.01634
	2.82	2.18	1.77	0.673521
GM	1.24	0.87	0.93	1.13683
	2.23	0.8	0.79	1.51351
	2.48	1.28	1.46	0.649658
GH	0.96	0.98	0.78	1.20398
	0.86	0.81	0.58	1.84738
	2.07	0.93	1.54	0.677962

## Sheet: figure5
	Figure 5-A	B	C		D	E	F		N	O	P	Q
Group	IL1 mRNA	IL6 mRNA	TNF mRNA		IL1	IL6	TNF		iNOS	VCAM	LOX-1	MCP-1
C	0.838032	0.780395	0.818667		17.783	2.26933	430.257		1	1	1	1
	1.08806	0.952279	1.06717		16.0275	2.15671	424.457		1	1	1	1
	1.0967	1.34562	1.07042		12.2299	2.96941	394.725		1	1	1	1
M	90.2734	12.4898	2.24129		186.31	6.32491	537.732		4.62	3.34	3.098	3.03109
	134.477	13.5469	2.24231		175.069	8.82656	534.366		4.56	4.21	1.82673	1.93804
	135.407	17.8769	2.5246		170.273	5.3255	519.677		3.66	5.37	2.91148	2.37197
GL	73.217	10.724	2.07051		167.721	4.82996	497.109		4.23	4.17	1.93627	2.01808
	77.5447	10.78	2.15072		169.635	4.33884	515.103		4.94	3.14	1.22854	1.364
	87.1412	12.1388	2.19802		142.087	4.40137	482.776		3.35	4.37	1.90789	1.54404
GM	61.0002	9.91657	1.43994		138.321	4.06597	466.216		2.26	2.69	1.9233	1.37392
	67.4362	9.93257	1.57177		126.138	3.5748	479.643		3.84	3.34	0.784717	0.6527
	73.0011	10.3766	1.64236		113.42	3.97559	484.422		2.1	2.27	1.62227	1.04639
GH	31.3025	8.4132	1.14461		101.407	3.06341	454.629		2.66	1.19	1.19027	1.09848
	46.4214	9.25244	1.34302		106.028	3.44013	460.57		1.15	1.76	1.00738	0.93061
	50.6328	9.50096	1.40444		106.633	3.78969	443.056		1.02	1.66	2.03105	0.915808

## Sheet: figure6
	Figure 6-A	B	C	D		F	G	H	I
Group	Neutral red uptake assay	AXL mRNA	MERTK mRNA	TYRO3 mRNA		AXL	MERTK	TYRO3	MFGE8
C	0.684	1.10119	0.986323	1.09585		1	1	1	1
	0.639	0.994221	0.934163	1.00186		1	1	1	1
	0.723	0.913389	1.08532	0.910851		1	1	1	1
M	0.12	0.371625	0.524113	0.6314		0.54	0.61	0.33	0.37
	0.156	0.328718	0.471783	0.503609		0.44	0.35	0.54	0.42
	0.148	0.275635	0.572775	0.5413		0.32	0.48	0.53	0.4
GL	0.234	0.437722	0.944474	0.536498		0.98	0.82	0.87	1.17
	0.142	0.440035	0.859578	0.724835		0.72	0.77	0.63	0.98
	0.111	0.386251	0.701708	0.782855		0.81	0.57	0.8	0.57
GM	0.488	0.459427	1.3425	0.985824		1.45	1.32	1.23	1.28
	0.357	0.491678	1.39592	0.960985		0.62	0.62	0.99	1.65
	0.237	0.485429	1.23772	0.922454		0.9	0.71	1.07	1.73
GH	0.715	0.492318	1.46265	1.16899		1.21	0.84	0.88	0.81
	0.414	0.549252	0.937931	1.45131		0.55	0.85	1.28	0.92
	0.578	0.530586	1.43411	1.40479		0.81	0.72	1.05	1.85

## Sheet: figure7
	Figure 7-B	C	D	E
Group	p-JNK	p-ERK1/2	p-P38	p-NF-κB
C	1	1	1	1
	1	1	1	1
	1	1	1	1
M	13.78	2.77	3.39	1.92348
	12.47	1.77	2.44	3.79942
	7.25	2.57	2.73	2.63356
GL	4.35	1.43	2.13	1.11012
	1.86	1.85	0.72	1.89832
	5.36	1.92	2.32	1.42174
GM	5.97	0.77	2.16	0.950538
	4.92	1.54	0.86	1.73905
	4.37	1.43	1.5	1.26743
GH	7.86	1.13	1.56	0.807935
	6.91	1.04	1.04	1.69307
	5.24	1.44	1.38	1.45353

## Sheet: figure8
	Figure 8-A	B	C		D	E	F		G
Group	IL1 mRNA	IL6 mRNA	TNF mRNA		IL1	IL6	TNF		Neutral red uptake assay
C	1.12729	1.29537	1.03529		14.2738	2.28736	415.051		0.403
	0.953803	0.883059	0.92648		12.2299	1.28736	394.725		0.512
	0.930049	0.874212	1.04256		11.9382	3.06299	379.634		0.769
M	228.985	16.4593	2.44917		221.129	23.2491	594.594		0.201
	204.738	15.3409	2.99452		217.189	19.255	580.677		0.166
	177.177	17.1337	2.99188		196.002	21.5671	605.103		0.149
GXK	58.1329	8.03251	1.05723		105.71	8.82656	511.791		0.638
	55.7933	6.91816	0.998386		101.407	7.1222	505.053		0.499
	54.761	9.8418	0.895242		90.1712	10.0737	484.882		0.426
GXK+asiatic acid	197.177	14.3921	1.78243		190.503	16.9327	554.881		0.249
	195.629	13.3332	1.64922		187.921	20.6123	541.452		0.171
	176.965	15.7402	1.53215		166.31	17.2491	537.109		0.317
GXK+anisomycin	173.477	13.2393	1.71247		173.469	16.3415	565.115		0.242
	162.247	14.3016	1.55116		180.273	16.9406	538.109		0.379
	149.401	13.9979	1.40077		169.635	18.2709	546.934		0.346
GXK+LM22B-10	181.329	12.9288	1.20463		167.721	14.2868	525.878		0.33
	157.933	13.3687	1.77401		161.992	18.9691	534.422		0.202
	147.61	13.5686	1.67546		142.087	17.196	542.776		0.187
