# Supplementary material for: Guanxinkang Decoction Attenuates the Inflammation in Atherosclerosis by Regulating Efferocytosis and MAPKs Signaling Pathway in LDLR−/− Mice and RAW264.7 Cells
Source: Front Pharmacol. 2021 Dec 7;12:731769. doi: 10.3389/fphar.2021.731769 (PMC8688952; doi:10.3389/fphar.2021.731769)
Supplement: Supplementary file 5 [file DataSheet6.ZIP]

Archive with 19 entries (18 files):
- figure 1-J(caspase 3)/
- figure 1-J(caspase 3)/ATO-1.tif
- figure 1-J(caspase 3)/ATO-2.tif
- figure 1-J(caspase 3)/ATO-3.tif
- figure 1-J(caspase 3)/C-1.tif
- figure 1-J(caspase 3)/C-2.tif
- figure 1-J(caspase 3)/C-3.tif
- figure 1-J(caspase 3)/GH-1.tif
- figure 1-J(caspase 3)/GH-2.tif
- figure 1-J(caspase 3)/GH-3.tif
- figure 1-J(caspase 3)/GL-1.tif
- figure 1-J(caspase 3)/GL-2.tif
- figure 1-J(caspase 3)/GL-3.tif
- figure 1-J(caspase 3)/GM-1.tif
- figure 1-J(caspase 3)/GM-2.tif
- figure 1-J(caspase 3)/GM-3.tif
- figure 1-J(caspase 3)/M-1.tif
- figure 1-J(caspase 3)/M-2.tif
- figure 1-J(caspase 3)/M-3.tif
